# Supplementary material for: Effects of vessel traffic and underwater noise on the movement, behaviour and vocalisations of bottlenose dolphins in an urbanised estuary
Source: PubMed Central journal article supplement (PMC5647363; doi:10.1038/s41598-017-13252-z), 2017-10-18

**Effects of vessel traffic and underwater noise on the movement, behaviour and vocalisations of bottlenose dolphins in an urbanised estuary**

Sarah A. Marley\*, Chandra P. Salgado Kent, Christine Erbe and Iain M. Parnum

Centre for Marine Science and Technology (CMST), Curtin University, Perth, Western Australia

**\*Corresponding Author:** [sarah.marley86@gmail.com](mailto:sarah.marley86@gmail.com)

Supplementary Information

Supplementary Table S1 Definition of dolphin activity states (adapted from Shane et al. 1986 and Lusseau, 2003)

| <b>Activity State</b> | <b>Definition</b>                                                                                                                                                                         |
|-----------------------|-------------------------------------------------------------------------------------------------------------------------------------------------------------------------------------------|
| Foraging (FO)         | Dolphins involved in any effort to capture and consume prey, often involving quick, steep dives of long duration. Diving birds or jumping fish may also be observed.                      |
| Milling (MI)          | Dolphins show frequent changes in heading, but stay in same location with no net movement.                                                                                                |
| Resting (RE)          | Dolphins engaged in slow movements or 'logging' at the surface.                                                                                                                           |
| Socialising (SO)      | Dolphins engaged in a diverse number of interactive behavioural events, including body contact, chasing, leaping, or hitting the water surface with body parts. Groups may split or join. |
| Travelling (TR)       | Dolphins engaged in persistent, directional movement with short, relatively constant dive intervals.                                                                                      |

Supplementary Table S2 Summary of the best fitting model for each whistle characteristic considering broadband noise levels, dolphin activity state, group size and calf presence. Explanatory variables with 'NA' were not included in the final model;  $\leq 0.001$  \*\*\*;  $\leq 0.01$  \*\*;  $\leq 0.05$  \*

| Duration              |                    |            |          |          |     |
|-----------------------|--------------------|------------|----------|----------|-----|
| Smooth Term           | EDF                | F          | p-value  |          |     |
| NL_BB                 | 3.814              | 4.45       | 0.00107  | **       |     |
| Parametric Terms      | Parameter Estimate | Std. Error | t-value  | p-value  |     |
| Intercept             | -1.27040           | 0.13895    | -9.143   | 3.66e-16 | *** |
| <b>Activity State</b> |                    |            |          |          |     |
| <i>Milling</i>        | -0.12007           | 0.11740    | -1.023   | 0.3080   |     |
| <i>Socialising</i>    | -0.74158           | 0.15895    | -4.666   | 6.69e-06 | *** |
| <i>Travelling</i>     | 0.20874            | 0.08920    | 2.340    | 0.0206   | *   |
| <b>Group Size</b>     | 0.25221            | 0.05753    | 4.384    | 2.16e-05 | *** |
| <b>Calf Presence</b>  | NA                 | NA         | NA       | NA       |     |
| Min Frequency         |                    |            |          |          |     |
| Smooth Term           | EDF                | F          | p-value  |          |     |
| NL_BB                 | 3.26               | 6.187      | 0.000102 | ***      |     |
| Parametric Terms      | Parameter Estimate | Std. Error | t-value  | p-value  |     |
| Intercept             | 8.30880            | 0.04726    | 175.793  | < 2e-16  | *** |
| <b>Activity State</b> |                    |            |          |          |     |
| <i>Milling</i>        | 0.17376            | 0.07937    | 2.189    | 0.03010  | *   |
| <i>Socialising</i>    | 0.07199            | 0.09986    | 0.721    | 0.47205  |     |
| <i>Travelling</i>     | 0.17464            | 0.06088    | 2.869    | 0.00471  | **  |
| <b>Group Size</b>     | NA                 | NA         | NA       | NA       |     |
| <b>Calf Presence</b>  | -0.09619           | 0.05534    | -1.738   | 0.08149  |     |
| Max Frequency         |                    |            |          |          |     |
| Smooth Term           | EDF                | F          | p-value  |          |     |
| NL_BB                 | 3.14               | 21.46      | 1.08e-14 | ***      |     |
| Parametric Terms      | Parameter Estimate | Std. Error | t-value  | p-value  |     |
| Intercept             | 9.37662            | 0.02303    | 407.127  | < 2e-16  | *** |
| <b>Activity State</b> |                    |            |          |          |     |
| <i>Milling</i>        | -0.14304           | 0.03867    | -3.699   | 0.000302 | *** |
| <i>Socialising</i>    | -0.13646           | 0.04846    | -2.816   | 0.005506 | **  |
| <i>Travelling</i>     | -0.11681           | 0.02961    | -3.944   | 0.000122 | *** |

|                      |         |         |       |          |     |
|----------------------|---------|---------|-------|----------|-----|
| <b>Group Size</b>    | NA      | NA      | NA    | NA       |     |
| <b>Calf Presence</b> | 0.20377 | 0.02692 | 7.570 | 3.28e-12 | *** |

### Delta Frequency

| <b>Smooth Term</b> | <b>EDF</b> | <b>F</b> | <b>p-value</b> |  |     |
|--------------------|------------|----------|----------------|--|-----|
| <b>NL_BB</b>       | 3.839      | 20.83    | 3.51e-16       |  | *** |

| <b>Parametric Terms</b> | <b>Parameter Estimate</b> | <b>Std. Error</b> | <b>t-value</b> | <b>p-value</b> |     |
|-------------------------|---------------------------|-------------------|----------------|----------------|-----|
| <b>Intercept</b>        | 8.88953                   | 0.05168           | 172.010        | < 2e-16        | *** |

### Activity State

|                |          |         |        |          |     |
|----------------|----------|---------|--------|----------|-----|
| <i>Milling</i> | -0.35244 | 0.08673 | -4.064 | 7.72e-05 | *** |
|----------------|----------|---------|--------|----------|-----|

|                    |          |         |        |         |    |
|--------------------|----------|---------|--------|---------|----|
| <i>Socialising</i> | -0.29466 | 0.11114 | -2.651 | 0.00887 | ** |
|--------------------|----------|---------|--------|---------|----|

|                   |          |         |        |          |     |
|-------------------|----------|---------|--------|----------|-----|
| <i>Travelling</i> | -0.35491 | 0.06701 | -5.297 | 4.06e-07 | *** |
|-------------------|----------|---------|--------|----------|-----|

|                   |    |    |    |    |  |
|-------------------|----|----|----|----|--|
| <b>Group Size</b> | NA | NA | NA | NA |  |
|-------------------|----|----|----|----|--|

|                      |         |         |       |         |     |
|----------------------|---------|---------|-------|---------|-----|
| <b>Calf Presence</b> | 0.45766 | 0.06094 | 7.510 | 4.7e-12 | *** |
|----------------------|---------|---------|-------|---------|-----|

### Start Frequency

| <b>Smooth Term</b> | <b>EDF</b> | <b>F</b> | <b>p-value</b> |  |     |
|--------------------|------------|----------|----------------|--|-----|
| <b>NL_BB</b>       | 4.474      | 6.929    | 3.94e-06       |  | *** |

| <b>Parametric Terms</b> | <b>Parameter Estimate</b> | <b>Std. Error</b> | <b>t-value</b> | <b>p-value</b> |     |
|-------------------------|---------------------------|-------------------|----------------|----------------|-----|
| <b>Intercept</b>        | 8.35023                   | 0.04850           | 172.158        | < 2e-16        | *** |

### Activity State

|                |         |         |       |         |  |
|----------------|---------|---------|-------|---------|--|
| <i>Milling</i> | 0.15909 | 0.08120 | 1.959 | 0.05194 |  |
|----------------|---------|---------|-------|---------|--|

|                    |         |         |       |         |  |
|--------------------|---------|---------|-------|---------|--|
| <i>Socialising</i> | 0.09588 | 0.10589 | 0.905 | 0.36667 |  |
|--------------------|---------|---------|-------|---------|--|

|                   |         |         |       |         |    |
|-------------------|---------|---------|-------|---------|----|
| <i>Travelling</i> | 0.18008 | 0.06320 | 2.849 | 0.00499 | ** |
|-------------------|---------|---------|-------|---------|----|

|                   |    |    |    |    |  |
|-------------------|----|----|----|----|--|
| <b>Group Size</b> | NA | NA | NA | NA |  |
|-------------------|----|----|----|----|--|

|                      |          |         |        |         |  |
|----------------------|----------|---------|--------|---------|--|
| <b>Calf Presence</b> | -0.10563 | 0.05756 | -1.835 | 0.06843 |  |
|----------------------|----------|---------|--------|---------|--|

### End Frequency

| <b>Smooth Term</b> | <b>EDF</b> | <b>F</b> | <b>p-value</b> |  |     |
|--------------------|------------|----------|----------------|--|-----|
| <b>NL_BB</b>       | 3.243      | 17.68    | 1.71e-12       |  | *** |

| <b>Parametric Terms</b> | <b>Parameter Estimate</b> | <b>Std. Error</b> | <b>t-value</b> | <b>p-value</b> |     |
|-------------------------|---------------------------|-------------------|----------------|----------------|-----|
| <b>Intercept</b>        | 9.35074                   | 0.03489           | 267.968        | < 2e-16        | *** |

### Activity State

|                |          |         |        |         |    |
|----------------|----------|---------|--------|---------|----|
| <i>Milling</i> | -0.15346 | 0.05860 | -2.619 | 0.00971 | ** |
|----------------|----------|---------|--------|---------|----|

|                    |          |         |        |         |    |
|--------------------|----------|---------|--------|---------|----|
| <i>Socialising</i> | -0.21389 | 0.07368 | -2.903 | 0.00425 | ** |
|--------------------|----------|---------|--------|---------|----|

|                   |          |         |        |          |     |
|-------------------|----------|---------|--------|----------|-----|
| <i>Travelling</i> | -0.21882 | 0.04494 | -4.869 | 2.77e-06 | *** |
|-------------------|----------|---------|--------|----------|-----|

|                   |    |    |    |    |  |
|-------------------|----|----|----|----|--|
| <b>Group Size</b> | NA | NA | NA | NA |  |
|-------------------|----|----|----|----|--|

|                      |         |         |       |          |     |
|----------------------|---------|---------|-------|----------|-----|
| <b>Calf Presence</b> | 0.23310 | 0.04084 | 5.707 | 5.80e-08 | *** |
|----------------------|---------|---------|-------|----------|-----|

### Inflections

| <b>Smooth Term</b> | <b>EDF</b> | <b>Chi-square</b> | <b>p-value</b> |  |
|--------------------|------------|-------------------|----------------|--|
|--------------------|------------|-------------------|----------------|--|

|              |       |       |        |   |
|--------------|-------|-------|--------|---|
| <b>NL_BB</b> | 4.108 | 14.58 | 0.0139 | * |
|--------------|-------|-------|--------|---|

| <b>Parametric Terms</b> | <b>Parameter Estimate</b> | <b>Std. Error</b> | <b>t-value</b> | <b>p-value</b> |  |
|-------------------------|---------------------------|-------------------|----------------|----------------|--|
|-------------------------|---------------------------|-------------------|----------------|----------------|--|

|                  |          |         |        |          |  |
|------------------|----------|---------|--------|----------|--|
| <b>Intercept</b> | -0.29536 | 0.29108 | -1.015 | 0.310256 |  |
|------------------|----------|---------|--------|----------|--|

#### Activity State

|                |          |         |        |          |    |
|----------------|----------|---------|--------|----------|----|
| <i>Milling</i> | -0.76595 | 0.24421 | -3.136 | 0.001710 | ** |
|----------------|----------|---------|--------|----------|----|

|                    |          |         |        |          |     |
|--------------------|----------|---------|--------|----------|-----|
| <i>Socialising</i> | -1.23611 | 0.36062 | -3.428 | 0.000609 | *** |
|--------------------|----------|---------|--------|----------|-----|

|                   |         |         |       |          |  |
|-------------------|---------|---------|-------|----------|--|
| <i>Travelling</i> | 0.04023 | 0.15075 | 0.267 | 0.789573 |  |
|-------------------|---------|---------|-------|----------|--|

|                   |         |         |       |          |     |
|-------------------|---------|---------|-------|----------|-----|
| <b>Group Size</b> | 0.45154 | 0.11981 | 3.769 | 0.000164 | *** |
|-------------------|---------|---------|-------|----------|-----|

|                      |         |         |       |          |     |
|----------------------|---------|---------|-------|----------|-----|
| <b>Calf Presence</b> | 0.61350 | 0.13797 | 4.446 | 8.73e-06 | *** |
|----------------------|---------|---------|-------|----------|-----|

### Extrema

| <b>Smooth Term</b> | <b>EDF</b> | <b>Chi-square</b> | <b>p-value</b> |  |
|--------------------|------------|-------------------|----------------|--|
|--------------------|------------|-------------------|----------------|--|

|              |       |       |          |     |
|--------------|-------|-------|----------|-----|
| <b>NL_BB</b> | 3.353 | 26.12 | 3.84e-05 | *** |
|--------------|-------|-------|----------|-----|

| <b>Parametric Terms</b> | <b>Parameter Estimate</b> | <b>Std. Error</b> | <b>t-value</b> | <b>p-value</b> |  |
|-------------------------|---------------------------|-------------------|----------------|----------------|--|
|-------------------------|---------------------------|-------------------|----------------|----------------|--|

|                  |         |        |        |          |     |
|------------------|---------|--------|--------|----------|-----|
| <b>Intercept</b> | -2.6727 | 0.4758 | -5.618 | 1.94e-08 | *** |
|------------------|---------|--------|--------|----------|-----|

#### Activity State

|                |        |       |       |          |  |
|----------------|--------|-------|-------|----------|--|
| <i>Milling</i> | 0.8539 | 0.613 | 1.851 | 0.064129 |  |
|----------------|--------|-------|-------|----------|--|

|                    |         |        |        |          |  |
|--------------------|---------|--------|--------|----------|--|
| <i>Socialising</i> | -1.3227 | 0.7810 | -1.694 | 0.090323 |  |
|--------------------|---------|--------|--------|----------|--|

|                   |        |        |       |          |     |
|-------------------|--------|--------|-------|----------|-----|
| <i>Travelling</i> | 1.6834 | 0.3735 | 4.508 | 6.56e-06 | *** |
|-------------------|--------|--------|-------|----------|-----|

|                   |        |        |       |          |     |
|-------------------|--------|--------|-------|----------|-----|
| <b>Group Size</b> | 0.5887 | 0.1655 | 3.558 | 0.000374 | *** |
|-------------------|--------|--------|-------|----------|-----|

|                      |    |    |    |    |  |
|----------------------|----|----|----|----|--|
| <b>Calf Presence</b> | NA | NA | NA | NA |  |
|----------------------|----|----|----|----|--|

### Harmonics

| <b>Smooth Term</b> | <b>EDF</b> | <b>Chi-square</b> | <b>p-value</b> |  |
|--------------------|------------|-------------------|----------------|--|
|--------------------|------------|-------------------|----------------|--|

|              |       |       |        |   |
|--------------|-------|-------|--------|---|
| <b>NL_BB</b> | 7.306 | 16.04 | 0.0455 | * |
|--------------|-------|-------|--------|---|

| <b>Parametric Terms</b> | <b>Parameter Estimate</b> | <b>Std. Error</b> | <b>t-value</b> | <b>p-value</b> |  |
|-------------------------|---------------------------|-------------------|----------------|----------------|--|
|-------------------------|---------------------------|-------------------|----------------|----------------|--|

|                  |         |        |        |          |     |
|------------------|---------|--------|--------|----------|-----|
| <b>Intercept</b> | -2.7016 | 0.6562 | -4.117 | 3.83e-05 | *** |
|------------------|---------|--------|--------|----------|-----|

#### Activity State

|                |        |        |       |          |     |
|----------------|--------|--------|-------|----------|-----|
| <i>Milling</i> | 3.0940 | 0.8174 | 3.785 | 0.000154 | *** |
|----------------|--------|--------|-------|----------|-----|

|                    |        |        |       |          |  |
|--------------------|--------|--------|-------|----------|--|
| <i>Socialising</i> | 0.8052 | 1.0343 | 0.778 | 0.436307 |  |
|--------------------|--------|--------|-------|----------|--|

|                   |        |        |       |          |     |
|-------------------|--------|--------|-------|----------|-----|
| <i>Travelling</i> | 2.5907 | 0.7374 | 3.513 | 0.000442 | *** |
|-------------------|--------|--------|-------|----------|-----|

|                   |    |    |    |    |  |
|-------------------|----|----|----|----|--|
| <b>Group Size</b> | NA | NA | NA | NA |  |
|-------------------|----|----|----|----|--|

|                      |    |    |    |    |  |
|----------------------|----|----|----|----|--|
| <b>Calf Presence</b> | NA | NA | NA | NA |  |
|----------------------|----|----|----|----|--|

Supplementary Table S3 Summary of the best fitting model for each whistle characteristic, considering octave-band levels (OBLs) centred around 1 kHz (NL\_1000), 16 kHz (NL\_16000), and 32 kHz (NL\_32000). Explanatory variables with 'NA' were not included in the final model;  $\leq 0.001$  \*\*\*,  $\leq 0.01$  \*\*,  $\leq 0.05$  \*

| Duration         |                    |            |          |         |     |
|------------------|--------------------|------------|----------|---------|-----|
| Parametric Terms | Parameter Estimate | Std. Error | t-value  | p-value |     |
| Intercept        | -0.65978           | 0.03453    | -19.11   | < 2e-16 | *** |
| Smooth Terms     | EDF                | F          | p-value  |         |     |
| NL_1000          | 8.423              | 7.810      | 9.84e-10 |         |     |
| NL_16000         | 1.000              | 3.820      | 0.052602 |         |     |
| NL_32000         | 8.000              | 3.532      | 0.000665 |         |     |
|                  |                    |            |          |         | *** |
| Min Frequency    |                    |            |          |         |     |
| Parametric Terms | Parameter Estimate | Std. Error | t-value  | p-value |     |
| Intercept        | 8.3862             | 0.0213     | 393.8    | < 2e-16 | *** |
| Smooth Terms     | EDF                | F          | p-value  |         |     |
| NL_1000          | 8.103              | 10.024     | 5.02e-12 |         |     |
| NL_16000         | 4.765              | 1.675      | 0.114    |         |     |
| NL_32000         | NA                 | NA         | NA       |         |     |
| Max Frequency    |                    |            |          |         |     |
| Parametric Terms | Parameter Estimate | Std. Error | t-value  | p-value |     |
| Intercept        | 9.37007            | 0.01236    | 758.0    | < 2e-16 | *** |
| Smooth Terms     | EDF                | F          | p-value  |         |     |
| NL_1000          | 3.808              | 25.40      | < 2e-16  |         |     |
| NL_16000         | 1.000              | 20.17      | 1.34e-05 |         |     |
| NL_32000         | NA                 | NA         | NA       |         |     |
| Delta Frequency  |                    |            |          |         |     |
| Parametric Terms | Parameter Estimate | Std. Error | t-value  | p-value |     |
| Intercept        | 8.84362            | 0.02947    | 300.1    | < 2e-16 | *** |
| Smooth Terms     | EDF                | F          | p-value  |         |     |
| NL_1000          | 3.868              | 19.24      | 5.20e-05 |         |     |
| NL_16000         | NA                 | NA         | NA       |         |     |
| NL_32000         | 1.000              | 17.28      | 5.23e-05 |         |     |
|                  |                    |            |          |         | *** |
| Start Frequency  |                    |            |          |         |     |

| <b>Parametric Terms</b> | <b>Parameter Estimate</b> | <b>Std. Error</b> | <b>t-value</b> | <b>p-value</b> |     |
|-------------------------|---------------------------|-------------------|----------------|----------------|-----|
| <b>Intercept</b>        | 8.4294                    | 0.0228            | 369.7          | < 2e-16        | *** |
| <b>Smooth Terms</b>     | <b>EDF</b>                | <b>F</b>          | <b>p-value</b> |                |     |
| <b>NL_1000</b>          | 8.092                     | 10.11             | 3.62e-12       |                | *** |
| <b>NL_16000</b>         | 3.528                     | 1.58              | 0.188          |                |     |
| <b>NL_32000</b>         | NA                        | NA                | NA             |                |     |
| <b>End Frequency</b>    |                           |                   |                |                |     |
| <b>Parametric Terms</b> | <b>Parameter Estimate</b> | <b>Std. Error</b> | <b>t-value</b> | <b>p-value</b> |     |
| <b>Intercept</b>        | 9.29580                   | 0.01806           | 514.6          | < 2e-16        | *** |
| <b>Smooth Terms</b>     | <b>EDF</b>                | <b>F</b>          | <b>p-value</b> |                |     |
| <b>NL_1000</b>          | 5.045                     | 14.148            | 1.29e-13       |                | *** |
| <b>NL_16000</b>         | NA                        | NA                | NA             |                |     |
| <b>NL_32000</b>         | 1.428                     | 9.049             | 0.000271       |                | *** |
| <b>Inflections</b>      |                           |                   |                |                |     |
| <b>Parametric Terms</b> | <b>Parameter Estimate</b> | <b>Std. Error</b> | <b>t-value</b> | <b>p-value</b> |     |
| <b>Intercept</b>        | 0.89326                   | 0.05163           | 17.3           | < 2e-16        | *** |
| <b>Smooth Terms</b>     | <b>EDF</b>                | <b>Chi-square</b> | <b>p-value</b> |                |     |
| <b>NL_1000</b>          | 7.902                     | 19.253            | 0.0169         |                | *   |
| <b>NL_16000</b>         | 2.824                     | 9.063             | 0.0599         |                |     |
| <b>NL_32000</b>         | 8.483                     | 18.271            | 0.0267         |                | *   |
| <b>Extrema</b>          |                           |                   |                |                |     |
| <b>Parametric Terms</b> | <b>Parameter Estimate</b> | <b>Std. Error</b> | <b>t-value</b> | <b>p-value</b> |     |
| <b>Intercept</b>        | -0.3372                   | 0.1702            | -1.981         | 0.0476         | *   |
| <b>Smooth Terms</b>     | <b>EDF</b>                | <b>Chi-square</b> | <b>p-value</b> |                |     |
| <b>NL_1000</b>          | 6.753                     | 49.354            | 2.49e-08       |                | *** |
| <b>NL_16000</b>         | 2.108                     | 3.846             | 0.19614        |                |     |
| <b>NL_32000</b>         | 1.000                     | 10.734            | 0.00105        |                | **  |
| <b>Harmonics</b>        |                           |                   |                |                |     |
| <b>Parametric Terms</b> | <b>Parameter Estimate</b> | <b>Std. Error</b> | <b>t-value</b> | <b>p-value</b> |     |
| <b>Intercept</b>        | -1.5032                   | 0.7219            | -2.082         | 0.0373         | *   |
| <b>Smooth Terms</b>     | <b>EDF</b>                | <b>Chi-square</b> | <b>p-value</b> |                |     |

|                 |       |        |         |    |
|-----------------|-------|--------|---------|----|
| <b>NL_1000</b>  | 6.847 | 21.969 | 0.01558 | *  |
| <b>NL_16000</b> | 1.000 | 5.974  | 0.01452 | *  |
| <b>NL_32000</b> | 4.089 | 16.820 | 0.00514 | ** |

---



Supplementary Figure S4 Results of the nine whistle GAMs which selected the 1 kHz octave-band level (NL\_1000) as a significant explanatory variable.

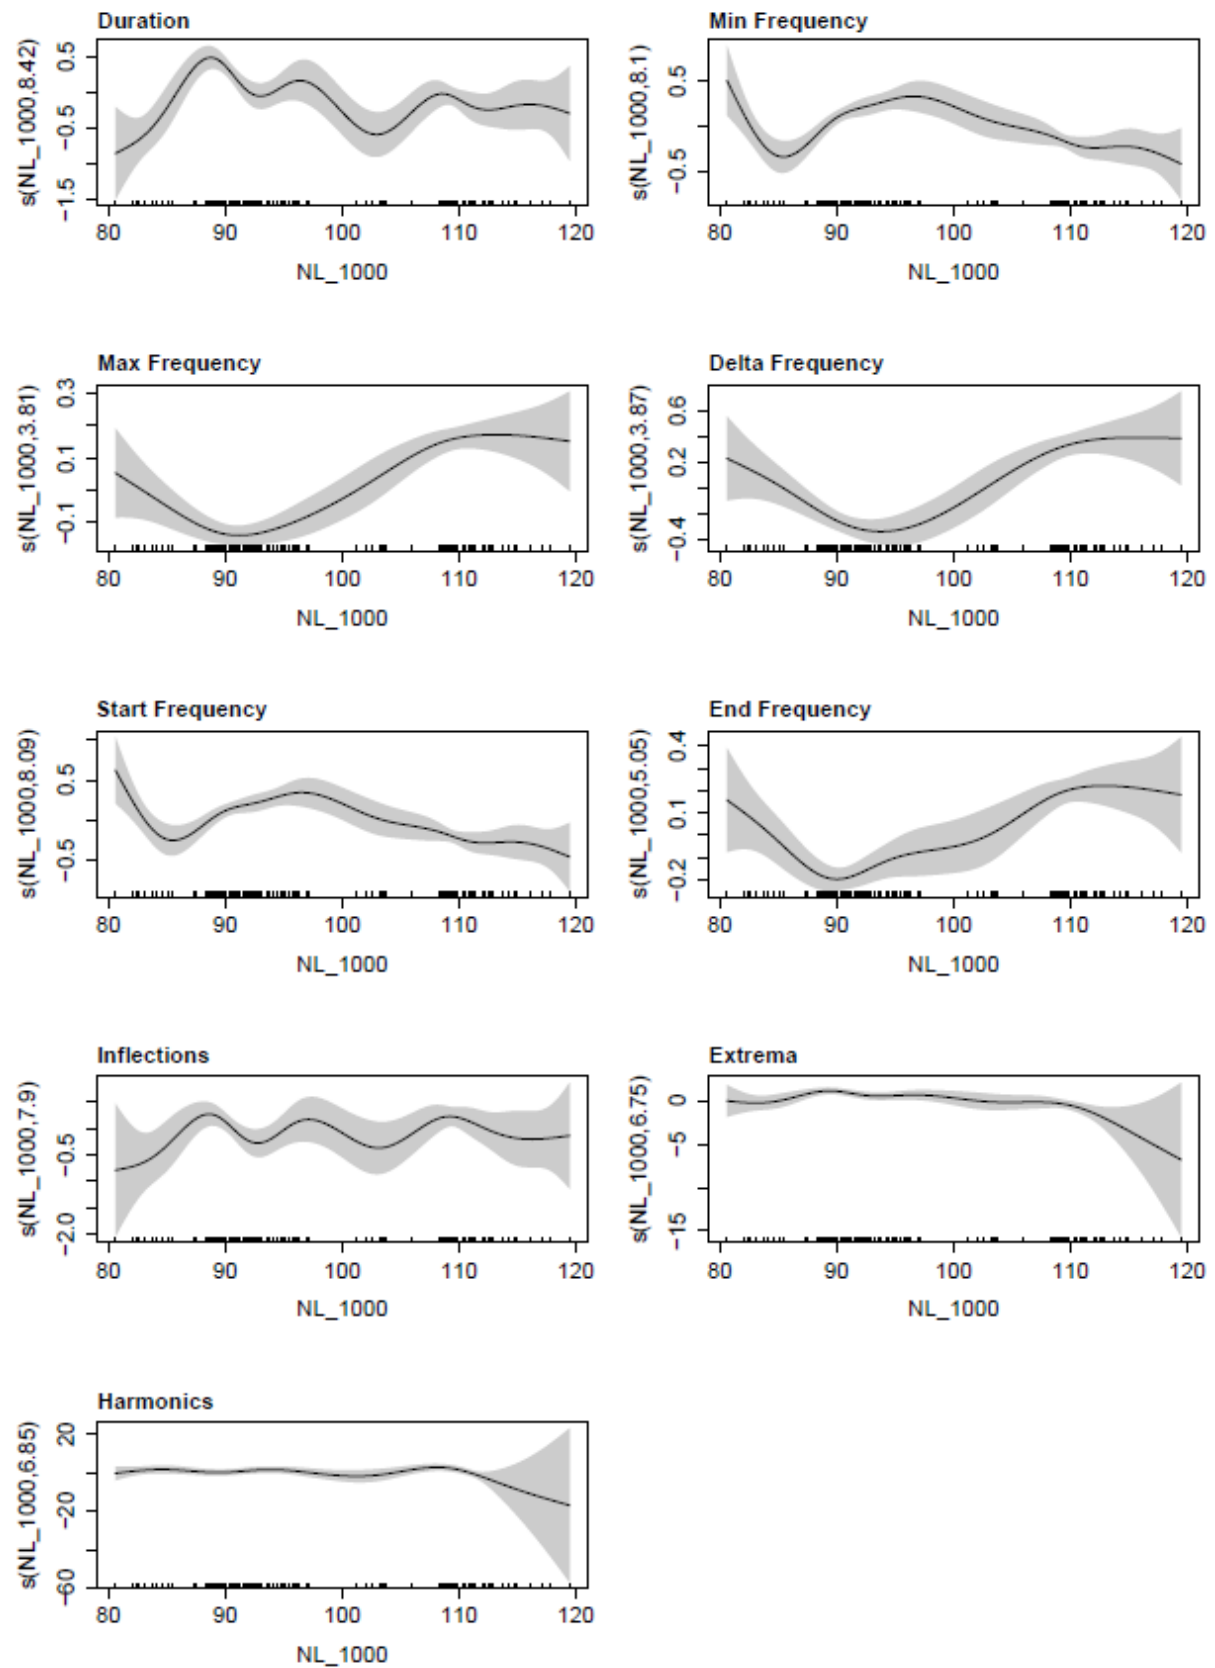

Supplementary Figure S5 Results of the three whistle GAMs which selected the 16 kHz octave-band level (NL\_16000) as a significant explanatory variable.

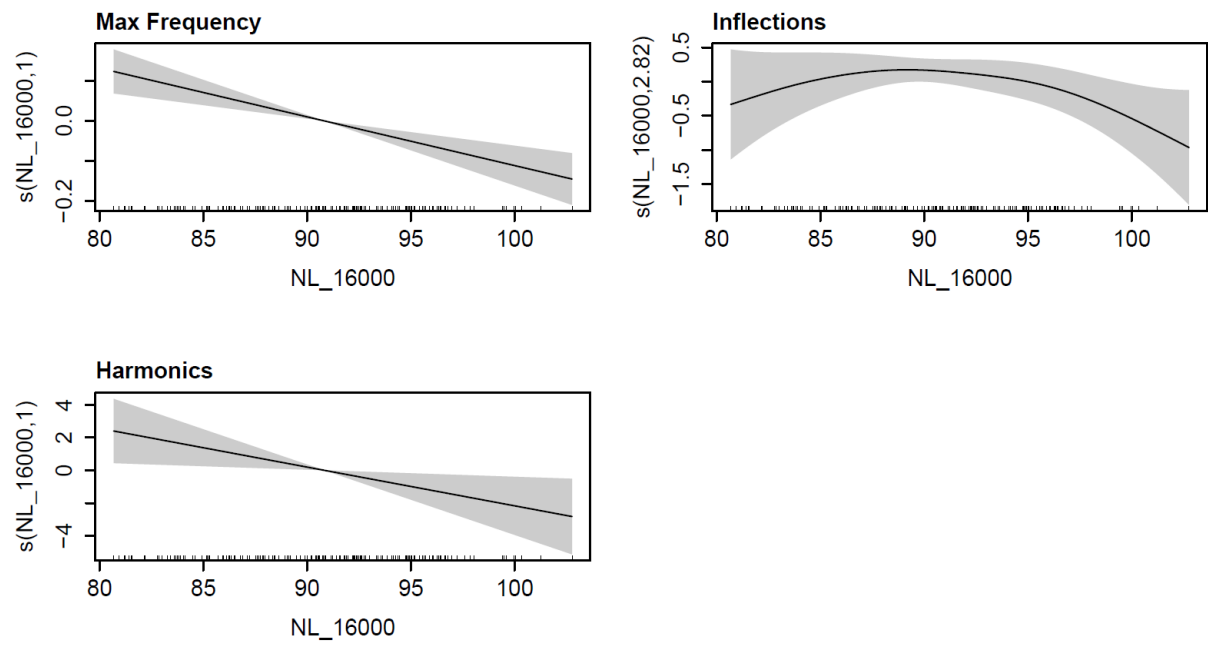

Supplementary Figure S6 Results of the six whistle GAMs which selected the 32 kHz octave-band level (NL\_32000) as a significant explanatory variable.

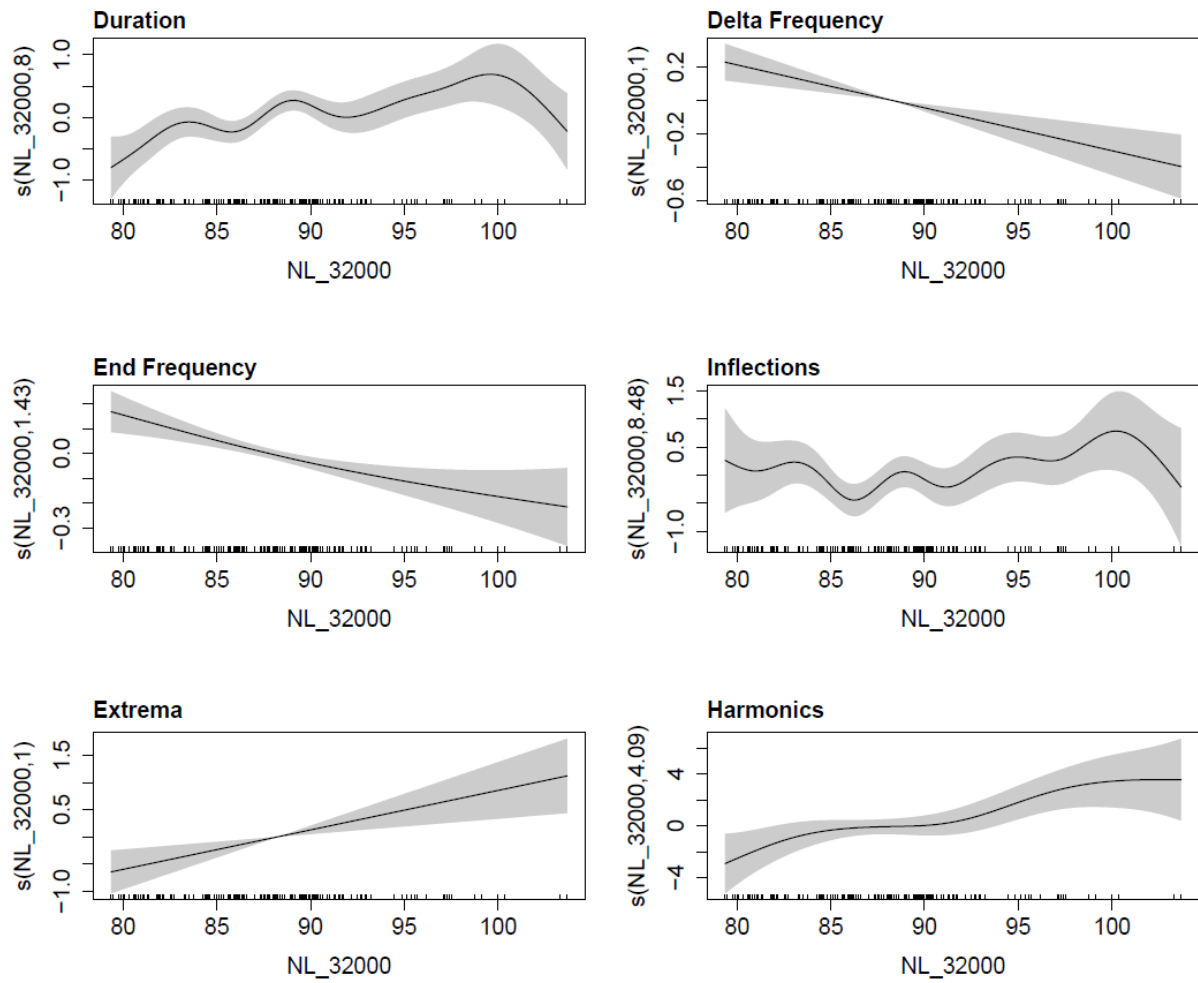

Supplement: 41598_2017_13252_MOESM1_ESM.pdf [file 41598_2017_13252_MOESM1_ESM.pdf]
